# Supplementary material
Source: PubMed Central journal article supplement (PMC5865030)
Supplement: IAI.00010-18_zii999092367s1.pdf [file IAI.00010-18_zii999092367s1.pdf]

**Supplementary table 1.** Primers used to construct the TIGR4  $\Delta$  *pspC* deletion mutant.

| Strain or primer                   | Relevant features or nucleotide sequence (5' to 3') <sup>a</sup> | Reference/ source or target gene <sup>b</sup>                         |
|------------------------------------|------------------------------------------------------------------|-----------------------------------------------------------------------|
| PBCN0094                           | Serotype 4                                                       | (1)                                                                   |
| PBCN0133                           | Serotype 6B                                                      | (1)                                                                   |
| PBCN0031                           | Serotype 3                                                       | (1)                                                                   |
| TIGR4                              | Serotype 4                                                       | (2)                                                                   |
| R6                                 | Unencapsulated                                                   | (3)                                                                   |
| TIGR4 $\Delta$ cps                 | Unencapsulated TIGR4 with kanamycin                              | (4)                                                                   |
| TIGR4 $\Delta$ pspC (spec)         | Serotype 4                                                       | This study                                                            |
| TIGR4 $\Delta$ pspC (kan)          | Serotype 4                                                       | This study                                                            |
| TIGR4 pspC2                        | Serotype 4                                                       | This study                                                            |
| TIGR4 pspC6                        | Serotype 4                                                       | This study                                                            |
| TIGR4 pspC9                        | Serotype 4                                                       | This study                                                            |
| TIGR4 pspC11                       | Serotype 4                                                       | This study                                                            |
| R6 pspC2                           | Unencapsulated                                                   | This study                                                            |
| R6 pspC6                           | Unencapsulated                                                   | This study                                                            |
| R6 pspC9                           | Unencapsulated                                                   | This study                                                            |
| R6 pspC11                          | Unencapsulated                                                   | This study                                                            |
| <b>Primers mutant construction</b> |                                                                  |                                                                       |
| Spn2190_L1                         | TTG AGG CAA TGG TGC ACA AG                                       | TIGR4 <i>pspC</i> ; left flank                                        |
| EMspn2190_L2                       | <u>CCACTAGTCTAGAGCGGCTACACTAGCTACTCCAACAC</u>                    | TIGR4 <i>pspC</i> ; left flank; overlap Spec <sup>res</sup> cassette  |
| EMspn2190_R1                       | CAAGATGAAGATCGCCTACG                                             | TIGR4 <i>pspC</i> ; right flank                                       |
| EMspn2190_R2a                      | <u>GCGTCAATTTCGAGGGGTATCGCTATGGAGTCAATGCCAAT</u>                 | TIGR4 <i>pspC</i> ; right flank; overlap Spec <sup>res</sup> cassette |
| EMspn2190_C                        | TCG TTC TCT GTC GCA TGA AC                                       | TIGR4 <i>pspC</i> ; control                                           |
| PBMrTn9                            | CAATGGTTCAGATACGACGAC                                            | Spec <sup>res</sup> cassette; control                                 |
| PBpR412_L                          | GCCGCTCTAGAACTAGTGG                                              | Spec <sup>res</sup> cassette; pR412 plasmid                           |
| PBpR412_R                          | GATACCCCTCGAATTGACGC                                             | Spec <sup>res</sup> cassette; pR412 plasmid                           |
| HBKanF4                            | GGAATTCGATATCAAGCTTA                                             | Kan <sup>res</sup> cassette; pR410 plasmid                            |
| HBKanR                             | AGGTACTAAAACAATTCATCC                                            | Kan <sup>res</sup> cassette; pR410 plasmid                            |
| HBKanR3                            | ATCCACATCGGCCAGATCGT                                             | Kan <sup>res</sup> cassette; control                                  |
| EMspn2190_pspC_kan_L2              | <u>TAAGCTTGATATCGAATTCCTACACTAGCTACTCCAACAC</u>                  | TIGR4 <i>pspC</i> ; left flank; overlap Kan <sup>res</sup> cassette   |
| EMspn2190_pspC_kan_R2              | <u>GGATGAATIGTTTTAGTACCTGCTATGGAGTCAATGCCAAT</u>                 | TIGR4 <i>pspC</i> ; right flank; overlap Kan <sup>res</sup> cassette  |
| EM_pspC_2_3_L2 new                 | <u>CTTTCGCTTTTIGATGCAAACAIGTTTTATTCTCTATATTT</u>                 | TIGR4; left flank; overlap <i>pspC</i> PBCN0094                       |
| EM_pspC_6_11_L2                    | <u>CTTTCGTTTTTIGATGCAAACAIGTTTTATTCTCTATATTT</u>                 | TIGR4; left flank; overlap <i>pspC</i> PBCN000133 & PBCN0031          |
| EM_pspC_9_L2                       | <u>CGCTCATGATTTGATTTAAACAIGTTTTATTCTCTATATTT</u>                 | TIGR4; left flank; overlap <i>pspC</i> PBCN0133                       |
| EM_pspC_2_3_Fw                     | ATGTTTGCATCAAAAAGCGAAAG                                          | PBCN0094 <i>pspC</i> ; forward                                        |
| EM_pspC_6_11_Fw                    | ATGTTTGCATCAAAAACGAAAG                                           | PBCN0133 & PBCN0031<br><i>pspC</i> ; forward                          |
| EM_pspC_9_Fw                       | ATGTTTAAATCAAATCATGAGCG                                          | PBCN0133 <i>pspC</i> ; forward                                        |
| EM_pspC_2_3_6_R2_spec              | <u>CAATGGTGAATGGGTAACATAAGCCGCTCTAGAACTAGTGG</u>                 | TIGR4; right flank; overlap PBCN0094 & PBCN0133                       |
| EM_pspC_9_11_R2_spec               | <u>CTTGCTAAGAAAAGAATGAAATAGCCGCTCTAGAACTAGTGG</u>                | TIGR4; right flank; overlap PBCN0133 & PBCN0031                       |

|                                  |                           |                                           |
|----------------------------------|---------------------------|-------------------------------------------|
| EM_pspC_2_3_6_Rev                | TTAGTTTACCCATTACCATTTG    | PBCN0094 & PBCN0133 <i>pspC</i> ; reverse |
| EM_pspC_9_11_Rev                 | CTATTTTCATTCTTTTCTTAGCAAG | PBCN0133 & PBCN0031; <i>pspC</i> reverse  |
| EM_pspC_2_Crev                   | GGTACTTGGGTAGCTCCCTC      | <i>pspC2</i> ; control                    |
| EM_pspC_3_9_Crev                 | CTGCTTGGGTACTTCCCTC       | <i>pspC6</i> ; control                    |
| EM_pspC_6_Crev                   | CGTGGAGTTATTCCCAATTCT     | <i>pspC9</i> ; control                    |
| EM_pspC_11_Crev                  | GCTACTTGGGTAGTTACCTC      | <i>pspC11</i> ; control                   |
| <b>Mutant validation by qPCR</b> |                           |                                           |
| Q- <i>pspC</i> -V2-F             | CAGGCAGAACAAGGAGAACA      | <i>pspC2</i> ; forward                    |
| Q- <i>pspC</i> -V2-R             | GCATAGCTCTCACCCACTATT     | <i>pspC2</i> ; reverse                    |
| Q- <i>pspC</i> -V6-F             | ACCGTAACTACCAACCAATAC     | <i>pspC6</i> ; forward                    |
| Q- <i>pspC</i> -V6-R             | CGAGATTCTTAGCTTCCTCTT     | <i>pspC6</i> ; reverse                    |
| Q- <i>pspC</i> -V9-F             | TGGAAGTCAGGCAGAACAAC      | <i>pspC9</i> ; forward                    |
| Q- <i>pspC</i> -V9-R             | GCATAGCTCTCACCCACTATT     | <i>pspC9</i> ; reverse                    |
| Q- <i>pspC</i> -V11-F            | TGGTTCATGCGACAGAGAAG      | <i>pspC11</i> ; forward                   |
| Q- <i>pspC</i> -V11-R            | CATCGACTGTATTAGCAGCTTTC   | <i>pspC11</i> ; reverse                   |
| Q-Sp- <i>gyrA</i> -F             | AATGAACGGGAACCCTTGGT      | <i>gyrA</i> ; forward                     |
| Q-Sp- <i>gyrA</i> -R             | CCATCCCAACCGGATAC         | <i>gyrA</i> ; reverse                     |

## References

1. **Cremers AJ, Mobegi FM, de Jonge MI, van Hijum SA, Meis JF, Hermans PW, Ferwerda G, Bentley SD, Zomer AL.** 2015. The post-vaccine microevolution of invasive *Streptococcus pneumoniae*. *Sci Rep* **5**:14952.
2. **Tettelin H, Nelson KE, Paulsen IT, Eisen JA, Read TD, Peterson S, Heidelberg J, DeBoy RT, Haft DH, Dodson RJ, Durkin AS, Gwinn M, Kolonay JF, Nelson WC, Peterson JD, Umayam LA, White O, Salzberg SL, Lewis MR, Radune D, Holtzapple E, Khouri H, Wolf AM, Utterback TR, Hansen CL, McDonald LA, Feldblyum TV, Angiuoli S, Dickinson T, Hickey EK, Holt IE, Loftus BJ, Yang F, Smith HO, Venter JC, Dougherty BA, Morrison DA, Hollingshead SK, Fraser CM.** 2001. Complete genome sequence of a virulent isolate of *Streptococcus pneumoniae*. *Science* **293**:498-506.
3. **Hoskins J, Alborn WE, Jr., Arnold J, Blaszcak LC, Burgett S, DeHoff BS, Estrem ST, Fritz L, Fu DJ, Fuller W, Geringer C, Gilmour R, Glass JS, Khoja H, Kraft AR, Lagace RE, LeBlanc DJ, Lee LN, Lefkowitz EJ, Lu J, Matsushima P, McAhren SM, McHenney M, McLeaster K, Mundy CW, Nicas TI, Norris FH, O'Gara M, Peery RB, Robertson GT, Rockey P, Sun PM, Winkler ME, Yang Y, Young-Bellido M, Zhao G, Zook CA, Baltz RH, Jaskunas SR, Rosteck PR, Jr., Skatrud PL, Glass JI.** 2001. Genome of the bacterium *Streptococcus pneumoniae* strain R6. *J Bacteriol* **183**:5709-5717.
4. **Cron LE, Bootsma HJ, Noske N, Burghout P, Hammerschmidt S, Hermans PW.** 2009. Surface-associated lipoprotein PpmA of *Streptococcus pneumoniae* is involved in colonization in a strain-specific manner. *Microbiology* **155**:2401-2410.
