# Supplementary material
Source: PubMed Central journal article supplement (PMC5865030)
Supplement: IAI.00010-18_zii999092367s2.pdf [file IAI.00010-18_zii999092367s2.pdf]

**Supplementary table 2.** Serotype, sequence type and pspC variants.

| Serotype | Sequence type | Number of isolates | pspC number in genome | best hit                   |
|----------|---------------|--------------------|-----------------------|----------------------------|
| 1        |               | 9                  | 1                     | 1 Variant_4                |
| 1        |               | 304                | 5                     | 1 Variant_2                |
| 1        |               | 306                | 27                    | 1 Variant_2                |
| 1        |               | 350                | 1                     | 1 Variant_2                |
| 3        |               | 180                | 4                     | 0                          |
| 3        |               | 180                | 18                    | 1 Variant_8                |
| 3        |               | 260                | 1                     | 1 Variant_3                |
| 3        |               | 505                | 1                     | 1 Variant_10               |
| 3        |               | 1220               | 3                     | 1 Variant_3                |
| 3        |               | 6014               | 1                     | 1 Variant_11               |
| 3        |               | 207                | 1                     | 2 Variant_10 and variant_3 |
| 3        |               | 1377               | 1                     | 2 Variant_3 and variant_9  |
| 4        |               | 162                | 1                     | 1 Variant_3                |
| 4        |               | 205                | 12                    | 1 Variant_2                |
| 4        |               | 206                | 1                     | 1 Variant_2                |
| 4        |               | 246                | 3                     | 1 Variant_2                |
| 4        |               | 247                | 9                     | 1 Variant_2                |
| 5        |               | 289                | 2                     | 0                          |
| 5        |               | 289                | 2                     | 1 Variant_3                |
| 8        |               | 53                 | 3                     | 1 Variant_6                |
| 8        |               | 53                 | 34                    | 1 Variant_3                |
| 8        |               | 944                | 1                     | 1 Variant_3                |
| 13       |               | 70                 | 1                     | 1 Variant_3                |
| 13       |               | 923                | 1                     | 1 Variant_3                |
| 14       |               | 9                  | 1                     | 0                          |
| 14       |               | 124                | 1                     | 0                          |
| 14       |               | 9                  | 11                    | 1 Variant_4                |
| 14       |               | 124                | 18                    | 1 Variant_4                |
| 14       |               | 409                | 1                     | 1 Variant_3                |
| 20       |               | 235                | 1                     | 1 Variant_3                |
| 27       |               | 1475               | 1                     | 1 Variant_3                |
| 27       |               | 4676               | 1                     | 1 Variant_3                |
| 34       |               | 478                | 1                     | 1 Variant_5                |
| 999      |               | 113                | 1                     | 1 Variant_3                |
| 999      |               | 162                | 1                     | 1 Variant_3                |
| 11A/D    |               | 62                 | 1                     | 1 Variant_3                |
| 12A/F    |               | 218                | 2                     | 1 Variant_3                |
| 12A/F    |               | 989                | 1                     | 1 Variant_3                |
| 15A      |               | 58                 | 2                     | 1 Variant_3                |
| 15B/C    |               | 1262               | 1                     | 0                          |
| 15B/C    |               | 199                | 1                     | 1 Variant_5                |
| 15B/C    |               | 3976               | 1                     | 1 Variant_1                |
| 16F      |               | 3450               | 1                     | 0                          |
| 18C      |               | 113                | 6                     | 1 Variant_3                |
| 18C      | NA            |                    | 1                     | 1 Variant_3                |

|         |      |    |                            |
|---------|------|----|----------------------------|
| 19A     | 66   | 1  | 1 Variant_3                |
| 19A     | 199  | 2  | 1 Variant_3                |
| 19A     | 230  | 1  | 1 Variant_5                |
| 19A     | 416  | 1  | 1 Variant_3                |
| 19A     | 667  | 1  | 1 Variant_3                |
| 19A     | 1201 | 1  | 1 Variant_3                |
| 19A     | 1848 | 1  | 1 Variant_4                |
| 19A     | 3017 | 3  | 1 Variant_3                |
| 19A     | 994  | 1  | 2 Variant_3 and variant_9  |
| 19A     | 3009 | 1  | 2 Variant_9 and variant_3  |
| 19F     | 51   | 1  | 1 Variant_9                |
| 19F     | 79   | 1  | 1 Variant_3                |
| 19F     | 162  | 1  | 1 Variant_3                |
| 19F     | 179  | 1  | 1 Variant_3                |
| 19F     | 230  | 1  | 1 Variant_5                |
| 19F     | 309  | 3  | 1 Variant_3                |
| 19F     | NA   | 1  | 1 Variant_6                |
| 19F     | 51   | 1  | 2 Variant_9 and variant_3  |
| 19F     | 1045 | 1  | 2 Variant_3 and variant_9  |
| 19F     | 5827 | 1  | 2 Variant_10 and variant_4 |
| 22A/F   | 433  | 12 | 1 Variant_4                |
| 22A/F   | 3705 | 2  | 1 Variant_5                |
| 22A/F   | 4110 | 1  | 1 Variant_4                |
| 23A     | 42   | 3  | 1 Variant_3                |
| 23A     | 97   | 1  | 1 Variant_5                |
| 23B     | 439  | 1  | 1 Variant_5                |
| 23B     | 1602 | 1  | 1 Variant_3                |
| 23F     | 36   | 7  | 1 Variant_6                |
| 23F     | 37   | 1  | 1 Variant_5                |
| 23F     | 60   | 1  | 1 Variant_5                |
| 23F     | 311  | 3  | 1 Variant_5                |
| 23F     | 1011 | 2  | 1 Variant_3                |
| 23F     | 1011 | 1  | 1 Variant_6                |
| 24A/B/F | 53   | 1  | 1 Variant_3                |
| 24A/B/F | 230  | 1  | 1 Variant_5                |
| 33A/F   | 60   | 2  | 1 Variant_5                |
| 33A/F   | 673  | 2  | 1 Variant_3                |
| 33A/F   | 2705 | 1  | 1 Variant_3                |
| 35B     | 162  | 1  | 1 Variant_3                |
| 35B     | 309  | 1  | 1 Variant_3                |
| 35B     | 446  | 1  | 1 Variant_5                |
| 35B     | 1635 | 2  | 1 Variant_5                |
| 6A      | 53   | 1  | 1 Variant_3                |
| 6A      | 138  | 1  | 1 Variant_3                |
| 6A      | 329  | 1  | 1 Variant_1                |
| 6A      | 690  | 1  | 1 Variant_3                |
| 6A      | NA   | 1  | 1 Variant_3                |
| 6A      | 207  | 2  | 2 Variant_3 and variant_10 |

|    |      |    |                           |
|----|------|----|---------------------------|
| 6A | 327  | 1  | 2 Variant_7 and variant_5 |
| 6A | 490  | 1  | 2 Variant_3 and variant_9 |
| 6A | NA   | 1  | 2 Variant_3 and variant_5 |
| 6B | 176  | 1  | 1 Variant_3               |
| 6B | 176  | 2  | 1 Variant_6               |
| 6B | 176  | 7  | 2 Variant_6 and variant_9 |
| 6C | 1379 | 2  | 1 Variant_4               |
| 7F | 191  | 36 | 1 Variant_3               |
| 7F | 1589 | 2  | 1 Variant_3               |
| 7F | 2331 | 2  | 1 Variant_3               |
| 7F | NA   | 1  | 1 Variant_2               |
| 9N | 66   | 4  | 1 Variant_3               |
| 9V | 53   | 1  | 1 Variant_3               |
| 9V | 60   | 1  | 1 Variant_5               |
| 9V | 162  | 14 | 1 Variant_3               |
| 9V | 162  | 1  | 1 Variant_7               |
| 9V | 165  | 1  | 1 Variant_3               |
| 9V | 8038 | 1  | 1 Variant_3               |
| 9V | 8138 | 1  | 1 Variant_3               |
| 9V | 43   | 1  | 2 Variant_9 and variant_3 |
