# Supplementary material
Source: PubMed Central journal article supplement (PMC5865030)
Supplement: IAI.00010-18_zii999092367s3.pdf [file IAI.00010-18_zii999092367s3.pdf]

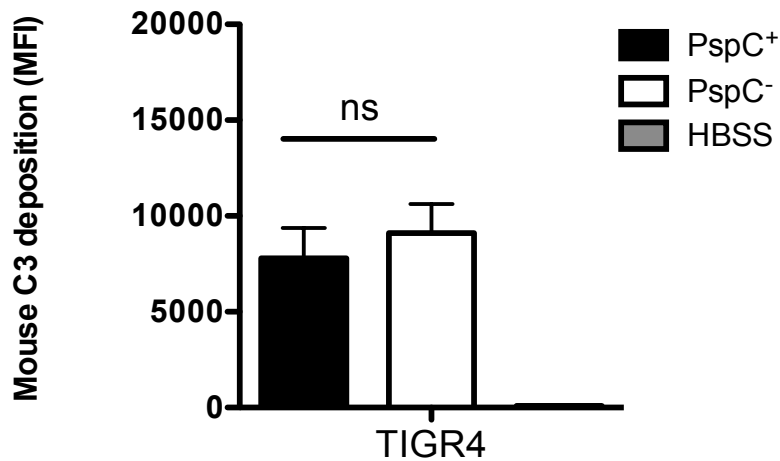

**Supplementary figure 1;** Mouse C3 deposition on the surface of encapsulated *Streptococcus pneumoniae* strain TIGR4 and its *pspC* deletion mutants (*pspC*<sup>-</sup>) was measured. C3 deposition were measured by flow cytometry following incubation of the bacteria for 30 min at 37 °C in 10% pooled human serum diluted in HBSS. Mouse C3 deposition is presented in mean fluorescence intensity (MFI). Each bar represents the mean ± standard deviation for results obtained from four separate experiments. Comparisons between strains was performed using an ANOVA for repeated measurements with a Bonferroni correction for multiple comparisons. Abbreviation: ns, not significant
