# Supplementary material
Source: PubMed Central journal article supplement (PMC5865030)
Supplement: IAI.00010-18_zii999092367s4.pdf [file IAI.00010-18_zii999092367s4.pdf]

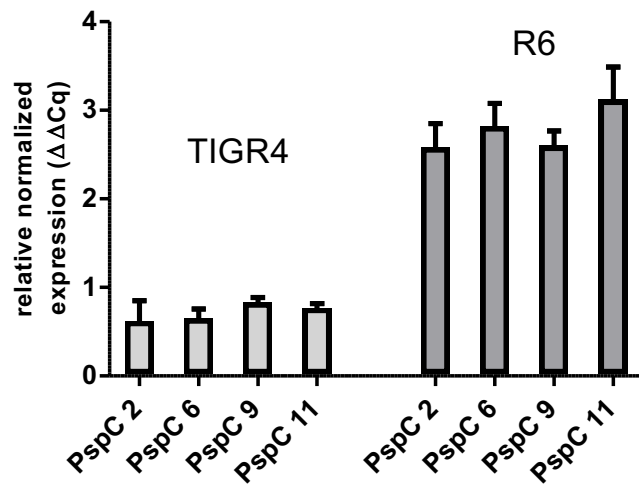

**Supplementary figure 2;** Real-time RT-PCR using pspC specific primers with a similar binding efficiency and GyrA as reference gene. Level of expression is shown as normalized expression  $\Delta\Delta Cq$  – relative quantity normalized to relative quantity of the reference gene.
